# Supplementary material for: Synergistic degradation of rhodamine B on BiOClxBr1−xsheets by combined photosensitization and photocatalysis under visible light irradiation
Source: Royal Society of Chemistry journal article supplement (doi:10.1039/c5nj00227c), 2015-01-01
Supplement: c5nj00227c1.pdf [file c5nj00227c1.pdf]

## Supplementary data

### Synergetic degradation of rhodamine B on $\text{BiOCl}_x\text{Br}_{1-x}$ sheets by combined photosensitization and photocatalysis under visible light irradiation

Dandan Du, Wenjuan Li\*, Shasha Chen, Tingjiang Yan, Jinmao You, Desheng Kong\*

*Shandong Province Key Laboratory of Life-Organic Analysis, Qufu Normal University, Qufu,  
273165, P. R. China*

Corresponding author Tel & Fax: (+86)537-4458301, E-mail: [liwenjuan2801@163.com](mailto:liwenjuan2801@163.com)

**Summary:** This file contains 9 pages, 2 tables, 7 figures.

**Table S1** The Eg of samples with different Cl/Br ratios

| Samples with different Cl/Br ratios | Eg (eV)                                |
|-------------------------------------|----------------------------------------|
| 0:1                                 | 2.75 ( $E_{CB}=0.30$ , $E_{VB}=3.05$ ) |
| 1:1                                 | 2.93 ( $E_{CB}=0.27$ , $E_{VB}=3.20$ ) |
| 2:1                                 | 3.03                                   |
| 5:1                                 | 3.24                                   |
| 1:0                                 | 3.26 ( $E_{CB}=0.13$ , $E_{VB}=3.39$ ) |
| 1:2                                 | 2.83                                   |
| 1:5                                 | 2.79                                   |

**Table S2** BET surface areas of  $\text{BiOCl}_x\text{Br}_{1-x}$  samples

| Samples with different Cl/Br ratios | $A_{\text{BET}}$ ( $\text{m}^2\text{g}^{-1}$ ) |
|-------------------------------------|------------------------------------------------|
| 0:1                                 | 13.02                                          |
| 1:1                                 | 19.00                                          |
| 2:1                                 | 10.94                                          |
| 5:1                                 | 10.31                                          |
| 1:0                                 | 5.70                                           |
| 1:2                                 | 9.18                                           |
| 1:5                                 | 6.51                                           |

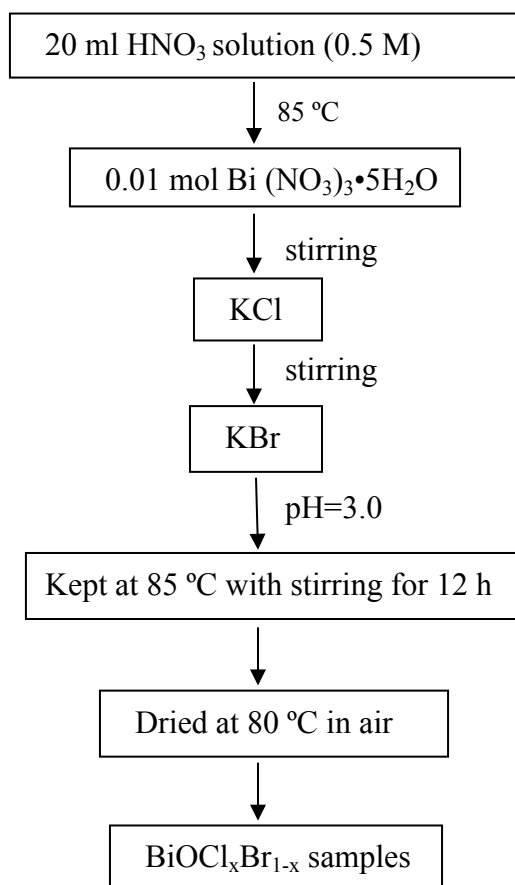

**Figure S1** A schematic diagram for the synthesis routes of  $\text{BiOCl}_x\text{Br}_{1-x}$  samples

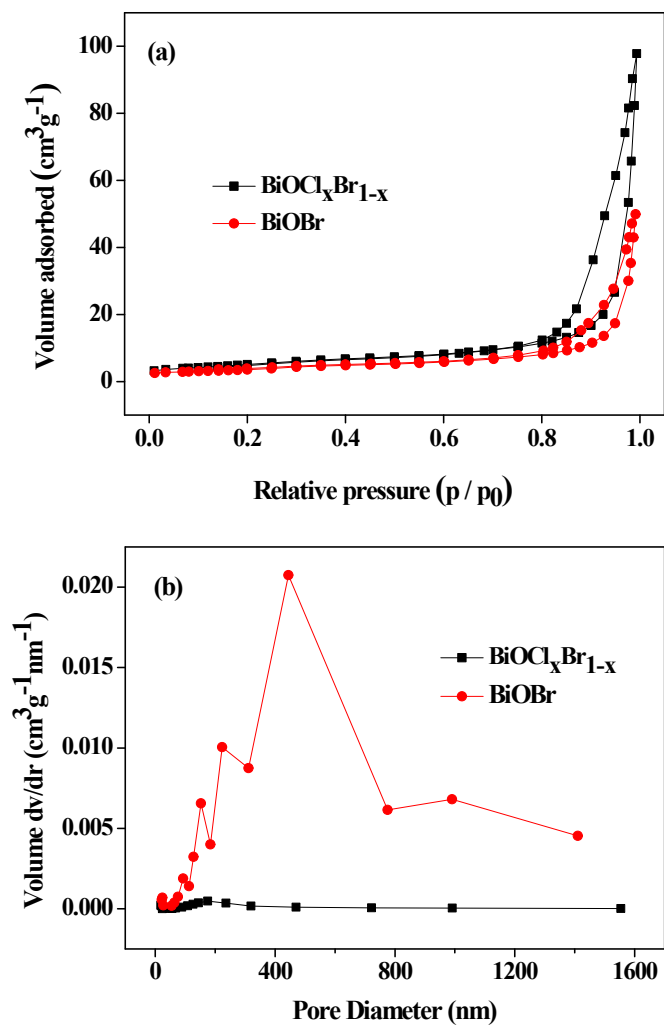

**Figure S2** Nitrogen adsorption–desorption isotherms (a) and pore size distributions (b) of the as-synthesized  $\text{BiOCl}_x\text{Br}_{1-x}$  (Cl:Br=1:1) and  $\text{BiOBr}$

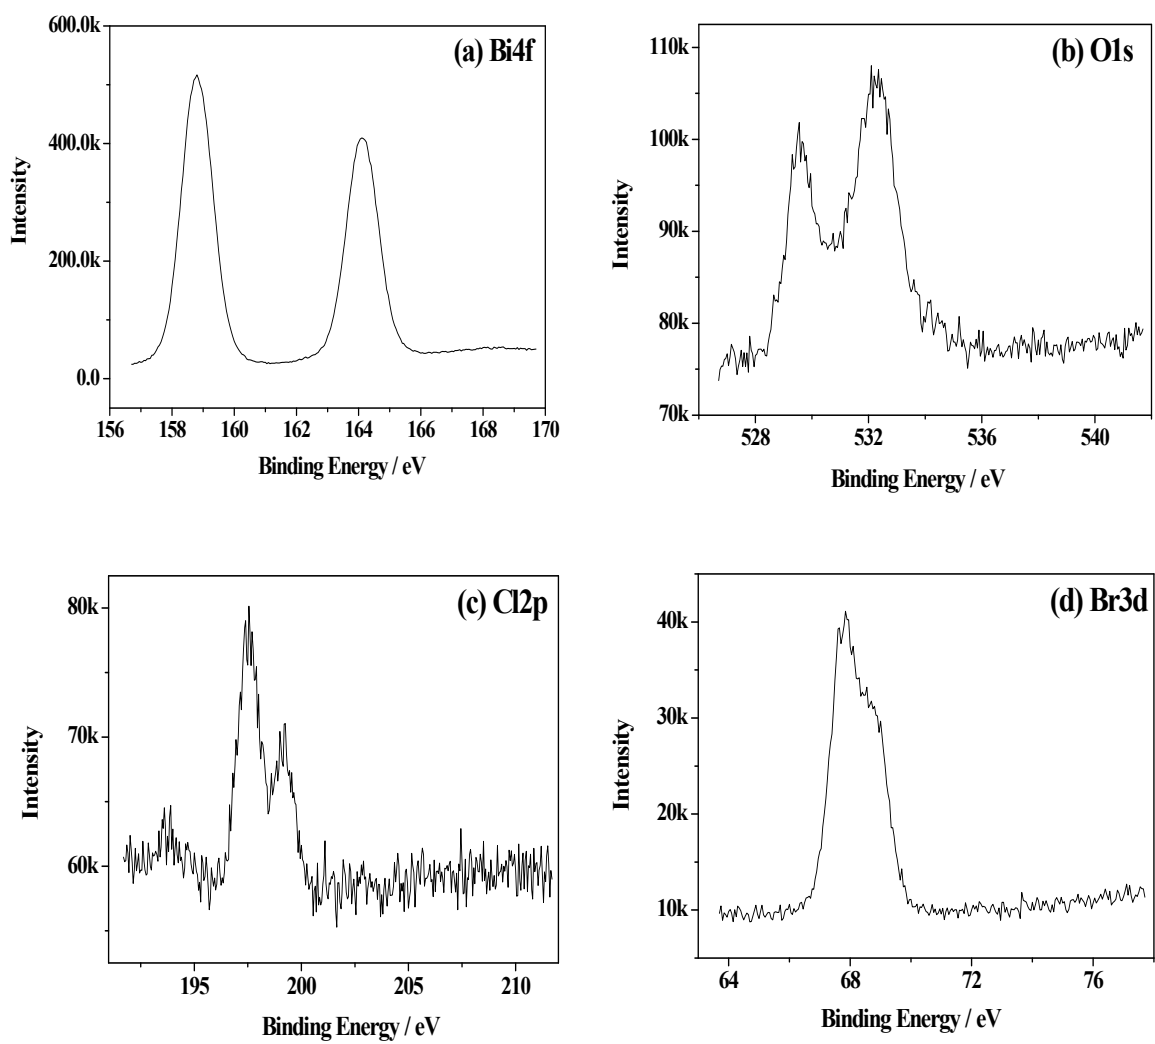

**Figure S3** XPS peaks for Bi4f, O1s, Cl2p and Br3d in  $\text{BiOCl}_x\text{Br}_{1-x}$  (Cl:Br=1:1) sample

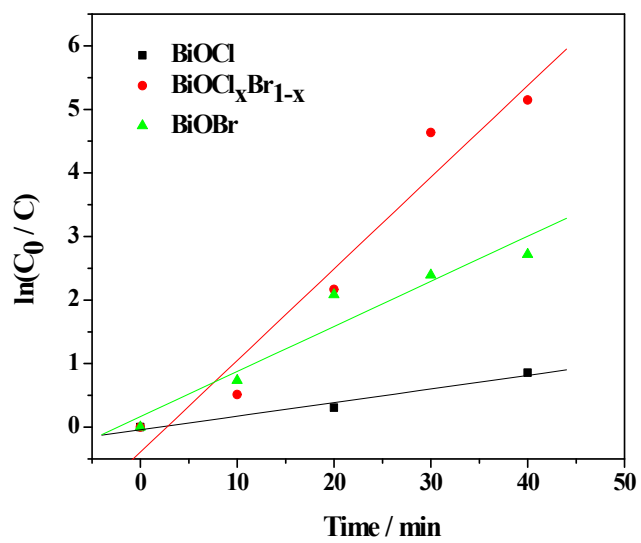

**Figure S4** Comparison of rate constants (fitted by pseudo-1st-order kinetic model) of BiOCl<sub>x</sub>Br<sub>1-x</sub> (Cl:Br=1:1), BiOBr and BiOCl

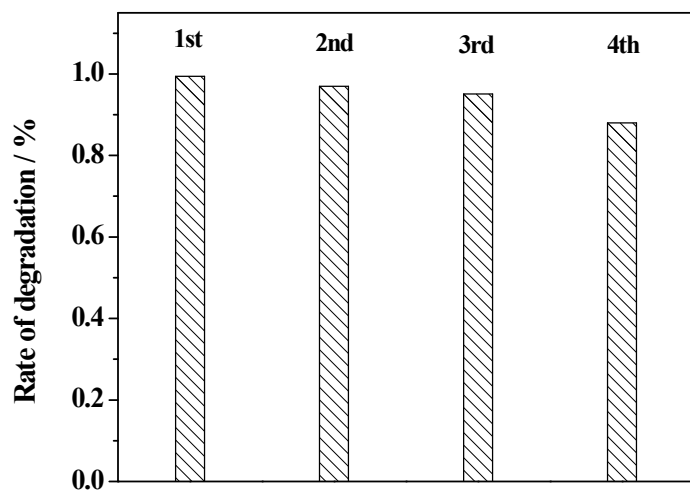

**Figure S5** The degradation rate of cycling runs for the photodegradation of RhB in the presence of  $\text{BiOCl}_x\text{Br}_{1-x}$  (Cl:Br=1:1) under visible light irradiation

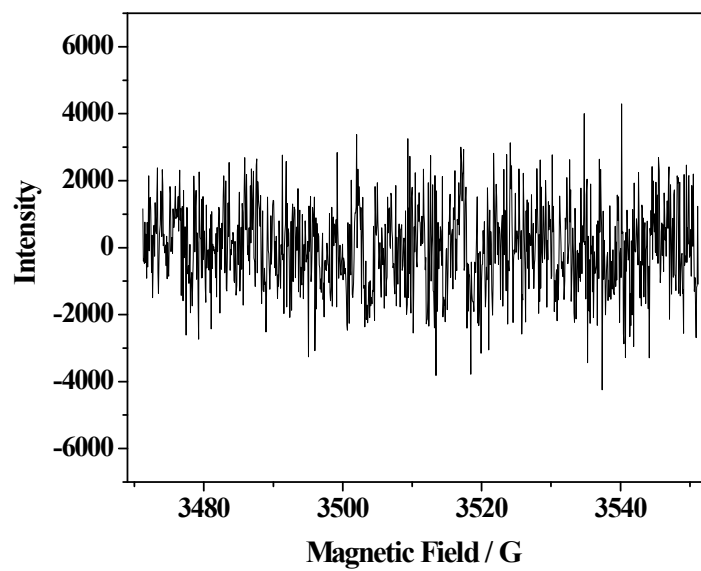

**Figure S6** DMPO spin-trapping ESR spectra in  $\text{BiOCl}_x\text{Br}_{1-x}$  (Cl:Br=1:1) aqueous dispersion for DMPO- $\cdot\text{OH}$  under visible light irradiation



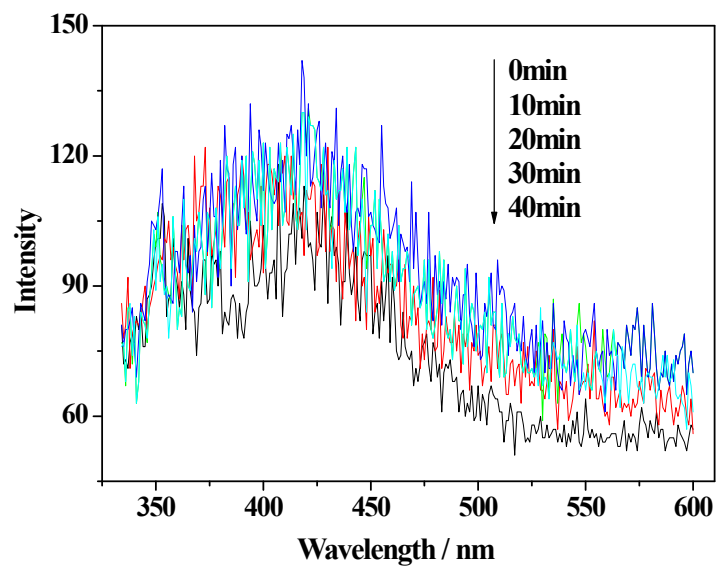

**Figure S7** •OH-trapping PL spectra of suspensions in  $\text{BiOCl}_x\text{Br}_{1-x}$  (Cl:Br=1:1) / TA system under visible light irradiation
